# Supplementary material for: Intradermal delivery of modified mRNA encoding VEGF-A in patients with type 2 diabetes
Source: PubMed Central journal article supplement (PMC6382754; doi:10.1038/s41467-019-08852-4), 2019-02-20
Supplement: 41467_2019_8852_MOESM5_ESM.pdf [file 41467_2019_8852_MOESM5_ESM.pdf]

## Supplementary Dataset 1

Largest mean changes in laboratory parameters from baseline.
